# Supplementary material for: Synthesis and Characterization of Newly Designed and Highly Solvatochromic Double Squaraine Dye for Sensitive and Selective Recognition towards Cu2+
Source: MDPI journal article supplement (doi:10.3390/molecules27196578), 2022-10-04
Supplement: s1 [file s1]

## **Supplementary Material**

# **Synthesis and Characterization of Newly Designed and Highly Solvatochromic Double Squaraine Dye for Sensitive and Selective Recognition towards Cu<sup>2+</sup>**

Linjun Tang\*, Shubham Sharma and Shyam S. Pandey\*

CC1=CC=C2C(=C1)N(C)C(=C2)C  
 $I^{-}$   
 $C_2H_5$

8.38602  
 8.32611  
 8.31149  
 8.25025  
 8.16597  
 8.14540  
 8.03568  
 7.82187  
 7.81355  
 7.80523  
 7.80528  
 7.80339  
 7.78853  
 7.72444  
 7.71059  
 7.70812  
 7.70813  
 7.69187  
 4.85261  
 4.72331  
 4.70480  
 4.67719  
 3.31891  
 3.31182  
 3.30966  
 3.30577  
 3.29526  
 2.95146  
 2.95256  
 1.84007  
 1.83953  
 1.64353  
 1.62867

-0.00015

Current Data Parameters  
 NAME May28-2021TD11  
 EXPNO 10  
 PROCNO 1

F2 - Acquisition Parameters  
 Date\_ 20210528  
 Time 22.06  
 INSTRUM spect  
 PROBHD 5 mm PABBO BB/  
 PULPROG zg30  
 TD 65536  
 SOLVENT MeOD  
 NS 32  
 DS 2  
 SWH 10000.000 Hz  
 FIDRES 0.152588 Hz  
 AQ 3.2767959 sec  
 RG 34.06  
 DW 50.000 usec  
 DE 6.50 usec  
 TE 294.4 K  
 D1 1.00000000 sec  
 TD0 1

----- CHANNEL f1 -----  
 SF01 500.0730881 MHz  
 NUC1 1H  
 P1 9.60 usec  
 PLW1 22.00000000 W

F2 - Processing parameters  
 SI 65536  
 SF 500.0700085 MHz  
 WDW EM  
 SSB 0  
 LB 0.30 Hz  
 GB 0  
 PC 1.00

13 12 11 10 9 8 7 6 5 4 3 2 1 ppm

1.013  
 1.001  
 1.004  
 1.000  
 1.001  
 1.001  
 1.000  
 4.014  
 2.058  
 0.584  
 0.112  
 0.098  
 6.113  
 3.042

MeOD  
 MeOH

Chemical structure: CC1=C(C)C(=C2C=CC=CC=C2N1C)C(=O)O

<sup>1</sup>H NMR spectrum (MeOD) showing peaks and integration values:

- 139.44955, 138.15678, 135.15678, 132.46135, 131.00409, 129.03465, 128.62631, 124.41184 (aromatic region)
- 113.75797 (aromatic region)
- 57.21075, 49.33833, 49.16884, 48.82733, 48.65464, 45.17490 (aromatic region)
- 22.33758, 14.08660, 14.01462, 13.45585, 13.25734, 13.25766, 13.37557 (methyl and ethyl region)
- 0.04392 (TMS)

Current Data Parameters

| NAME   | May28-2021TD11 |
|--------|----------------|
| EXPNO  | 11             |
| PROCNO | 1              |

F2 - Acquisition Parameters

| Date_   | 20210528       |
|---------|----------------|
| Time    | 23.51          |
| INSTRUM | spect          |
| PROBHD  | 5 mm PABBO BB/ |
| PULPROG | zgpg30         |
| TD      | 65536          |
| SOLVENT | MeOD           |
| NS      | 2048           |
| DS      | 2              |
| SWH     | 34090.310 Hz   |
| FIDRES  | 0.520186 Hz    |
| AQ      | 0.9611947 sec  |
| RG      | 188.4          |
| DW      | 14.667 usec    |
| DE      | 6.50 usec      |
| TE      | 295.0 K        |
| D1      | 2.00000000 sec |
| D11     | 0.03000000 sec |
| TDO     | 1              |

CHANNEL f1

|      |                |
|------|----------------|
| SFO1 | 125.757619 MHz |
| NUC1 | 13C            |
| P1   | 10.30 usec     |
| PLW1 | 110.00000000 W |

CHANNEL f2

|         |                 |
|---------|-----------------|
| SFO2    | 500.0720003 MHz |
| NUC2    | 1H              |
| CPDPRG2 | waltz16         |
| PCPD2   | 80.00 usec      |
| PLW2    | 22.00000000 W   |
| PLW12   | 0.31680000 W    |
| PLW13   | 0.20275000 W    |

F2 - Processing parameters

|     |                 |
|-----|-----------------|
| SI  | 32768           |
| SF  | 125.7425340 MHz |
| WDW | EM              |
| SSB | 0               |
| LB  | 1.00 Hz         |
| GB  | 0               |
| PC  | 1.40            |

S1









## 2. Mass spectral analysis:

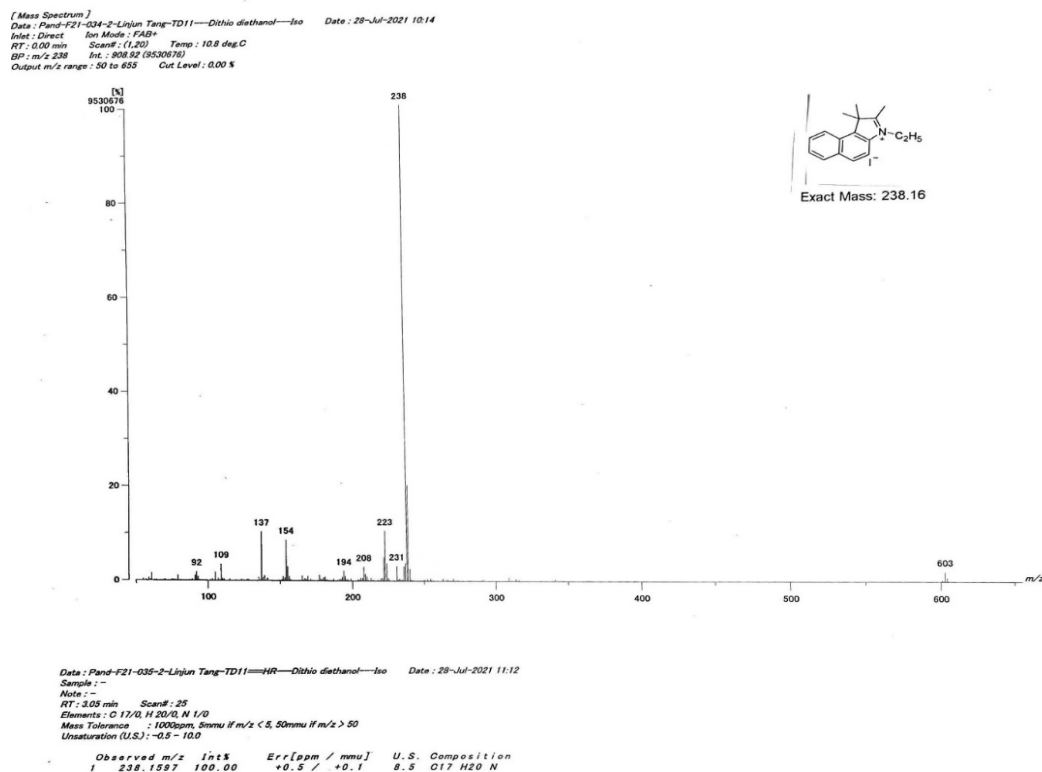

Figure S11. HR-MS spectrum of 3.

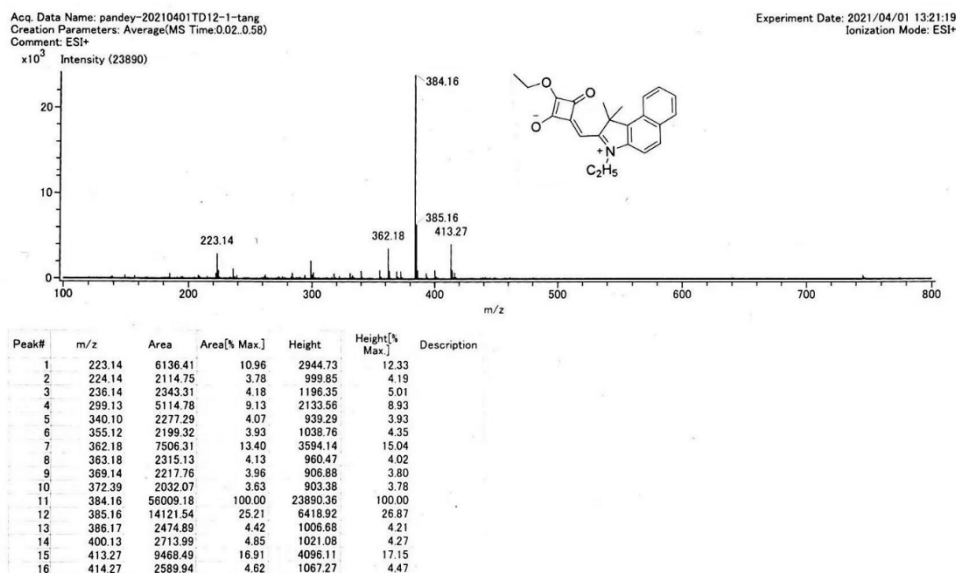

Figure S12. TOF-MS spectrum of 4.

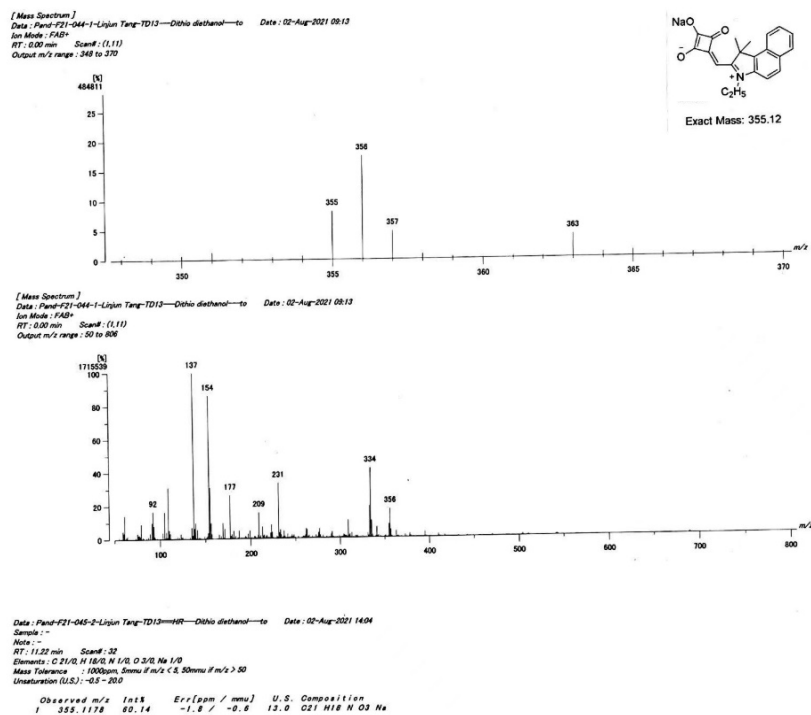

Figure S13. HR-MS spectrum of 5.

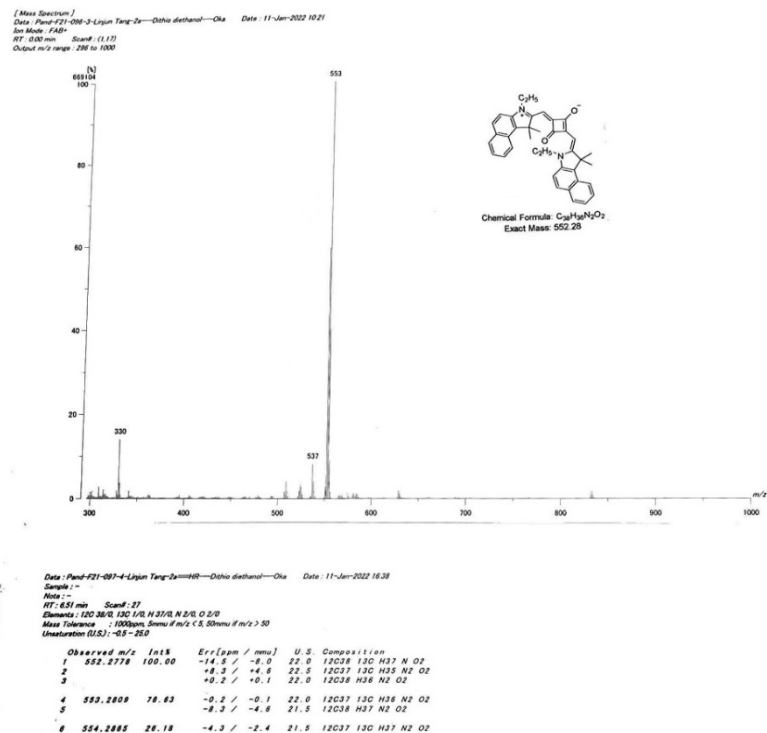

Figure S14. HR-MS spectrum of 6.



[Mass Spectrum]  
 Data: Pand-F22-059-3-Jirjun Tang-TM-DithiodE1OH-Oka Date: 04-Jul-2022 10:59  
 Ion Mode: FAB+  
 RT: 0.00 min Scan#: (1,16)  
 Output m/z range: 199 to 1000

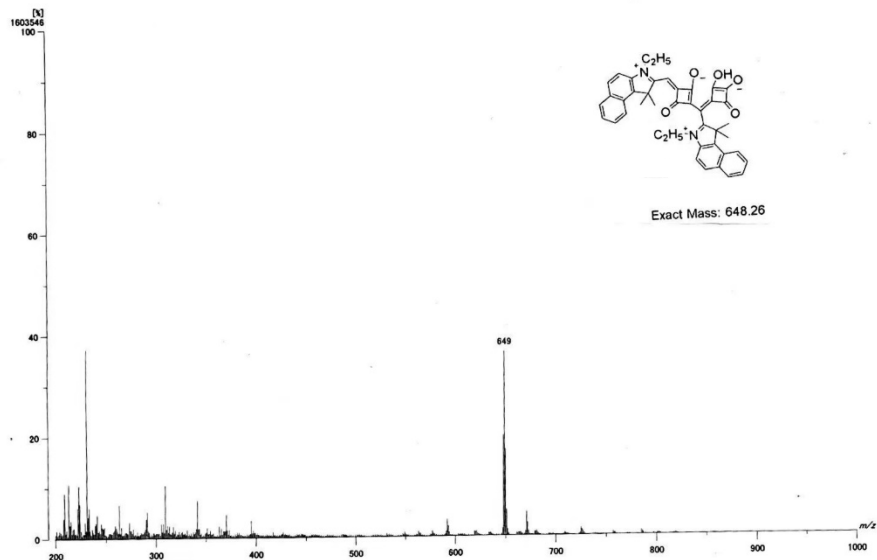

Data: Pand-F22-060-2-Jirjun Tang-TM-DithiodE1OH-Oka Date: 04-Jul-2022 11:25  
 Sample: -  
 Note: -  
 RT: 1.72 min Scan#: 8  
 Elements: 12C 42/0, 13C 2/0, H 37/0, N 2/2, O 5/5  
 Mass Tolerance: 1000ppm, 5mmu if m/z < 5, 50mmu if m/z > 50  
 Unsaturation (U.S.): -0.5 - 30.0

| Observed m/z | IntS   | Err(ppm / mmu) | U.S. | Composition          |
|--------------|--------|----------------|------|----------------------|
| 1 648.2639   | 64.93  | +16.1 / +10.4  | 25.0 | 12C40 13C2 H34 N2 O5 |
| 2            |        | +9.2 / +5.9    | 26.5 | 12C41 13C H35 N2 O5  |
| 3            |        | +2.3 / +1.5    | 26.0 | 12C42 H36 N2 O5      |
| 4 649.2712   | 100.00 | +15.2 / +9.9   | 26.5 | 12C40 13C2 H35 N2 O5 |
| 5            |        | +8.4 / +5.4    | 26.0 | 12C41 13C H36 N2 O5  |
| 6            |        | +1.5 / +1.0    | 25.5 | 12C42 H37 N2 O5      |
| 7 650.2757   | 44.24  | +10.1 / +6.6   | 26.0 | 12C40 13C2 H36 N2 O5 |
| 8            |        | +3.2 / +2.1    | 25.5 | 12C41 13C H37 N2 O5  |
| 9 651.2834   | 12.68  | +9.9 / +6.4    | 25.5 | 12C40 13C2 H37 N2 O5 |

Figure S15. HR-MS spectrum of 1.

### 3. UV-Vis Spectroscopic Studies:

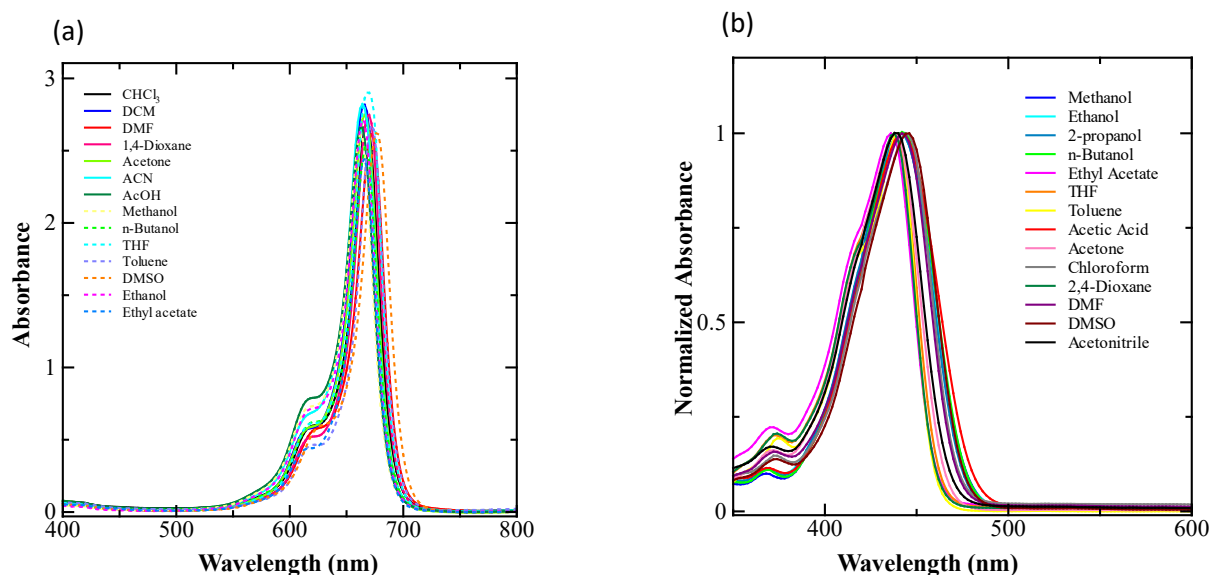

**Figure S16.** (a) UV-Vis spectra of **6** dissolved in different super dehydrated solvent (25  $\mu\text{M}$ ) and (b) UV-Vis spectra of **4** dissolved in different super dehydrated solvents (10  $\mu\text{M}$ ).

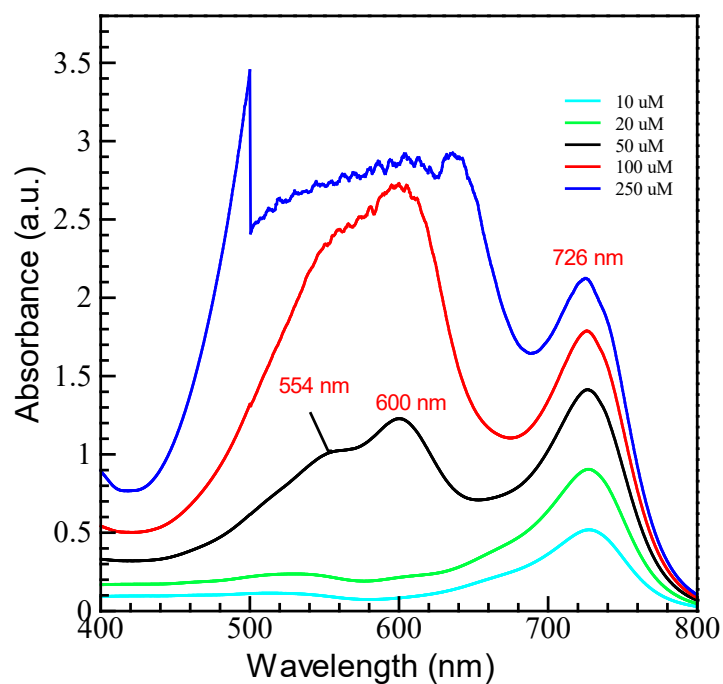

**Figure S17.** UV-Vis absorption of different concentration of DSQ (**1**) dissolved in DMF

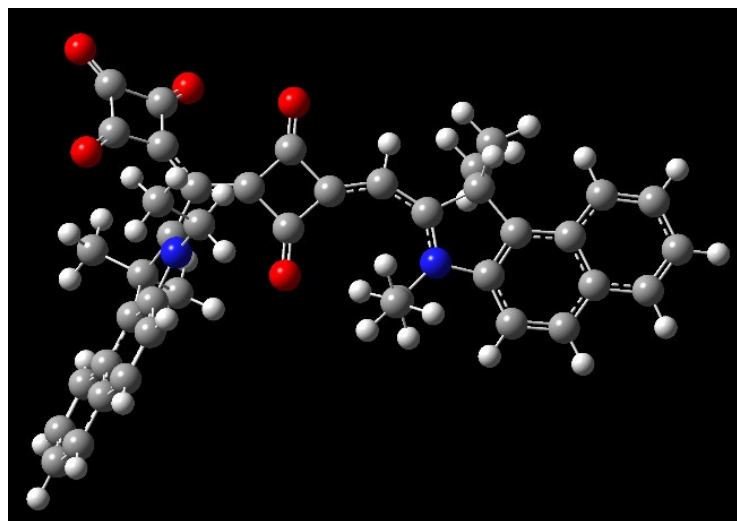

**Figure S18.** The three-dimensional structure of **1** utilizing Theoretical MO calculation (Gaussian G09 program)

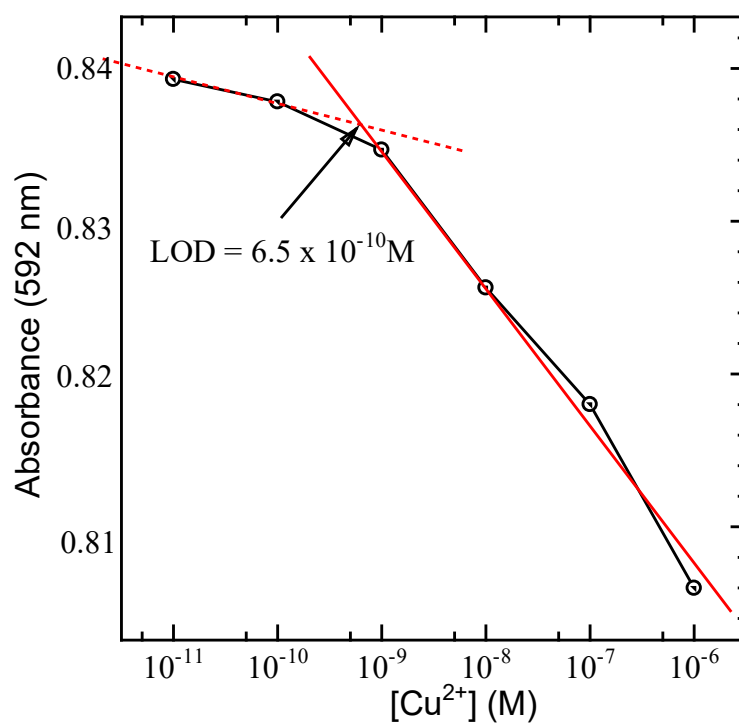

**Figure S19.** Change in absorbance at 592 nm upon addition of Cu<sup>2+</sup> ions showing limit of detection

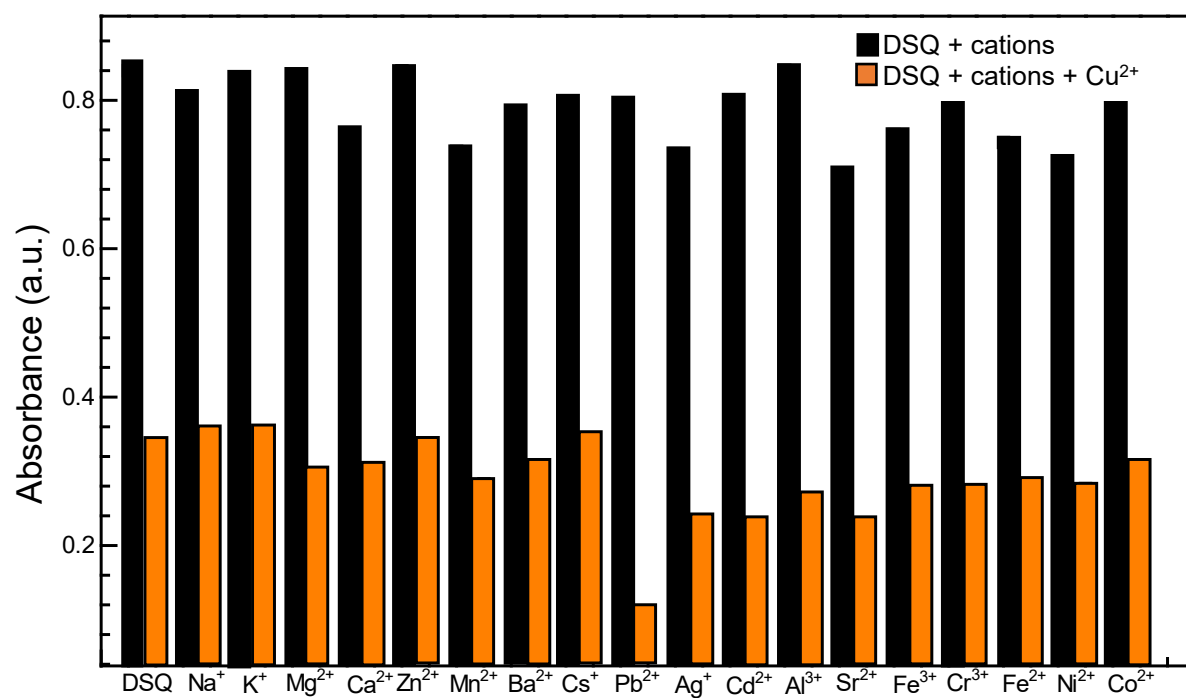

**Figure S20.** UV-Vis absorption at 592 nm of 10  $\mu\text{M}$  DSQ (**1**) (dissolved in DMF/ACN, 1:99, v/v) in different ion solutions after addition of  $\text{Cu}^{2+}$
